# Supplementary material for: Intoxicated Donors and Heart Transplant Outcomes: Long-Term Safety
Source: PubMed Central journal article supplement — Circ Heart Fail. 2021 Jul 28;14(8):e007433. doi: 10.1161/CIRCHEARTFAILURE.120.007433 (PMC8366767; doi:10.1161/circheartfailure.120.007433), 2021-07-28
Supplement: hhf-14-e007433-s001.pdf [file hhf-14-e007433-s001.pdf]

## SUPPLEMENTAL MATERIAL

The data for this study was obtained from the United Network for Organ Sharing ([www.unos.org](http://www.unos.org)). The data included freetext fields which could contain protected health information. For this reason, a data use agreement was necessary along with an Institutional Review Board Approval. On this basis, the authors cannot share the data but it can be requested from the United Network for Organ Sharing directly.

**Supplemental Table 1: UNOS Toxicology Fields**

| UNOS Field Name            | Number (%) of Donors Positive | Number (%) of Donors Negative | Number (%) of Donors Unknown | Number of Donors with NO Data | Meaning of Field                                    |
|----------------------------|-------------------------------|-------------------------------|------------------------------|-------------------------------|-----------------------------------------------------|
| <b>Current UNOS Fields</b> |                               |                               |                              |                               | <b>Collected since 6/30/2004</b>                    |
| ALCOHOL_HEAVY_DON          | 3743 (15.8 %)                 | 19574 (82.4%)                 | 421 (1.7%)                   | 10 (0.01 %)                   | Heavy Alcohol Use (heavy=2+ drinks/day)             |
| CONTIN_COCAINE_DON         | 1835 (7.7 %)                  | 1640 (6.9 %)                  | 574 (2.4 %)                  | 19699 (83%)                   | History of cocaine use+ recent 6-month use          |
| CONTIN_OTH_DRUG_DON        | 7447 (31.4 %)                 | 2363 (10 %)                   | 1167 (4.9 %)                 | 12771 (53.7 %)                | History of other drugs in past + recent 6-month use |
| HIST_COCAINE_DON           | 4049 (17%)                    | 19254 (81 %)                  | 417 (1. %)                   | 28 (0.1%)                     | History of cocaine use in past                      |
| HIST_OTH_DRUG_DON          | 10976 (46.2 %)                | 12485 (52.6 %)                | 259 (1.1 %)                  | 28 (0.12 %)                   | History of other drug use in past                   |
